# Supplementary material for: Bacterial Leaf Symbiosis in Angiosperms: Host Specificity without Co-Speciation
Source: PubMed Central journal article supplement (PMC3168474; doi:10.1371/journal.pone.0024430), 2011-09-07
Supplement: pone.0024430.s001.pdf [file pone.0024430.s001.pdf]

| Taxa                                             | Strain/Voucher | Origin | Accession numbers |          |          | Host plant |
|--------------------------------------------------|----------------|--------|-------------------|----------|----------|------------|
|                                                  |                |        | 16S rDNA          | recA     | gyrB     |            |
| <i>Bordetella avium</i>                          | 197N           |        | BAVs02            | BAV2309  | BAV3410  |            |
| <i>Bordetella pertussis</i>                      | Tohama I       |        | BPr01             | BP2546   | BP0489   |            |
| <i>Ralstonia pickettii</i>                       | 12J            |        | NC010678          | NC010682 | NC010682 |            |
| <i>Burkholderia ambifaria</i>                    | LMG 19182      |        | HQ849072          | HQ849130 | HQ849186 |            |
| <i>Burkholderia ambifaria</i>                    | MC40-6         |        | NC010552          | NC010551 | NC010551 |            |
| <i>Burkholderia andropogonis</i>                 | LMG 2129       |        | HQ849073          | HQ849131 | -        |            |
| <i>Burkholderia anthina</i>                      | LMG 20980      |        | HQ849074          | HQ849132 | HQ849187 |            |
| <i>Burkholderia bryophila</i>                    | LMG 23644      |        | HQ849075          | HQ849133 | HQ849188 |            |
| <i>Burkholderia caledonica</i>                   | LMG 19076      |        | AF215704          | AY619669 | EU024220 |            |
| <i>Burkholderia caledonica</i>                   | LMG 19076      |        | HQ849076          | HQ849134 | HQ849189 |            |
| <i>Burkholderia caribensis</i>                   | LMG 18531      |        | Y17009            | AY644639 | GU144374 |            |
| <i>Burkholderia caribensis</i>                   | LMG 18531      |        | HQ849077          | HQ849135 | HQ849190 |            |
| <i>Burkholderia caryophylli</i>                  | LMG 2155       |        | AB021423          | AY619663 | AB190573 |            |
| <i>Burkholderia cenocepacia</i>                  | LMG 16656      |        | AF148556          | AY951880 | DQ124427 |            |
| <i>Burkholderia cepacia</i>                      | LMG 1222       |        | EU024171          | AF143786 | EU024224 |            |
| <i>Burkholderia cepacia</i>                      | LMG 1222       |        | HQ849078          | JF295011 | HQ849191 |            |
| <i>Burkholderia dolosa</i>                       | LMG 18943      |        | HQ849079          | HQ849136 | HQ849192 |            |
| <i>Burkholderia ferrariae</i>                    | LMG 23612      |        | HQ849080          | HQ849137 | HQ849193 |            |
| <i>Burkholderia fungorum</i>                     | LMG 16225      |        | EU024155          | AJ549505 | EU024205 |            |
| <i>Burkholderia fungorum</i>                     | LMG 16225      |        | HQ849081          | HQ849138 | HQ849194 |            |
| <i>Burkholderia gladioli</i>                     | LMG 11626      |        | HQ849082          | HQ849139 | HQ849195 |            |
| <i>Burkholderia gladioli</i> pv. <i>gladioli</i> | LMG 2216       |        | EU024168          | AY619665 | AB190639 |            |
| <i>Burkholderia gladioli</i> pv. <i>gladioli</i> | LMG 2216       |        | HQ849083          | HQ849140 | HQ849196 |            |
| <i>Burkholderia glathei</i>                      | LMG 14190      |        | U96935            | AY619666 | EU024198 |            |
| <i>Burkholderia glathei</i>                      | LMG 14190      |        | HQ849084          | HQ849141 | HQ849197 |            |
| <i>Burkholderia glumae</i>                       | LMG 2196       |        | U96931            | AJ551324 | EU024213 |            |
| <i>Burkholderia glumae</i>                       | LMG 2196       |        | HQ849085          | HQ849142 | HQ849198 |            |
| <i>Burkholderia graminis</i>                     | LMG 18924      |        | EU024154          | AJ551267 | EU024212 |            |
| <i>Burkholderia graminis</i>                     | LMG 18924      |        | HQ849086          | HQ849143 | HQ849199 |            |
| <i>Burkholderia hospita</i>                      | LMG 20598      |        | HQ849087          | HQ849144 | HQ849200 |            |
| <i>Burkholderia kururiensis</i>                  | LMG 19447      |        | HQ849088          | HQ849145 | HQ849201 |            |
| <i>Burkholderia mallei</i>                       | NCTC 10229     |        | NC008835          | NC008836 | NC008836 |            |

|                                            |                        |              |          |          |            |                                              |
|--------------------------------------------|------------------------|--------------|----------|----------|------------|----------------------------------------------|
| <i>Burkholderia mimosarum</i>              | LMG 23256              |              | HQ849089 | HQ849146 | HQ849202   |                                              |
| <i>Burkholderia multivorans</i>            | LMG 13010              |              | HQ849090 | -        | HQ849203   |                                              |
| <i>Burkholderia multivorans</i>            | ATCC 17616             |              | AB092606 | AF143775 | DQ124425   |                                              |
| <i>Burkholderia nodosa</i>                 | LMG 23741              |              | HQ849091 | HQ849147 | HQ849204   |                                              |
| <i>Burkholderia oklahomensis</i>           | LMG 23618              |              | HQ849092 | HQ849148 | HQ849205   |                                              |
| <i>Burkholderia phenazinium</i>            | LMG 2247               |              | HQ849093 | HQ849149 | HQ849206   |                                              |
| <i>Burkholderia phenoliruptrix</i>         | LMG 22037              |              | HQ849094 | HQ849150 | HQ849207   |                                              |
| <i>Burkholderia phymatum</i>               | LMG 21445              |              | HQ849095 | HQ849151 | HQ849208   |                                              |
| <i>Burkholderia phytofirmans</i>           | LMG 22487              |              | HQ849096 | HQ849152 | Bphyt_0003 |                                              |
| <i>Burkholderia plantarii</i>              | LMG 9035               |              | U96933   | AJ551323 | EU024232   |                                              |
| <i>Burkholderia plantarii</i>              | LMG 9035               |              | HQ849098 | HQ849153 | HQ849210   |                                              |
| <i>Burkholderia plantarii</i>              | LMG 16020              |              | HQ849097 | HQ849154 | HQ849209   |                                              |
| <i>Burkholderia pyrrocinia</i>             | LMG 14191              |              | U96930   | AF143794 | EU024236   |                                              |
| <i>Burkholderia pyrrocinia</i>             | LMG 14191              |              | HQ849099 | HQ849155 | HQ849211   |                                              |
| <i>Burkholderia sacchari</i>               | LMG 19450              |              | HQ849100 | HQ849156 | HQ849212   |                                              |
| <i>Burkholderia silvatlantica</i>          | LMG 23149              |              | HQ849102 | HQ849157 | HQ849213   |                                              |
| <i>Burkholderia stabilis</i>               | LMG 14294              |              | EU024183 | AF456031 | DQ124428   |                                              |
| <i>Burkholderia stabilis</i>               | LMG 14294              |              | HQ849103 | HQ849159 | JF295010   |                                              |
| <i>Burkholderia terricola</i>              | LMG 20581              |              | HQ849104 | HQ849160 | HQ849215   |                                              |
| <i>Burkholderia thailandensis</i>          | LMG 20219              |              | EF535235 | AY619656 | EU024228   |                                              |
| <i>Burkholderia tropica</i>                | LMG 22274              |              | HQ849105 | HQ849161 | HQ849216   |                                              |
| <i>Burkholderia tuberum</i>                | LMG 21444              |              | EU024149 | AY644642 | EU024193   |                                              |
| <i>Burkholderia tuberum</i>                | LMG 21444              |              | HQ849106 | HQ849162 | HQ849217   |                                              |
| <i>Burkholderia ubonensis</i>              | LMG 20358              |              | EU024179 | AY780511 | EU024234   |                                              |
| <i>Burkholderia vietnamiensis</i>          | LMG 10929              |              | AF097534 | AF143793 | EU024229   |                                              |
| <i>Burkholderia vietnamiensis</i>          | LMG 10929              |              | HQ849107 | HQ849163 | HQ849218   |                                              |
| <i>Burkholderia xenovorans</i>             | LMG 21463              |              | HQ849108 | HQ849164 | HQ849219   |                                              |
| <i>Candidatus Burkholderia alatipes</i>    | BR-Dessein et al. 2547 | Cameroon     | JN053515 | JN054098 | JN053967   | <i>Psychotria alatipes</i> Wernham           |
| <i>Candidatus Burkholderia alatipes</i>    | BR-Dessein et al. 2555 | Cameroon     | JN053516 | JN054099 | JN053968   | <i>Psychotria alatipes</i> Wernham           |
| <i>Candidatus Burkholderia amboniana</i>   | UPS-Luke 8344          | Kenya        | -        | JN054100 | JN053969   | <i>Psychotria amboniana</i> K.Schum.         |
| <i>Candidatus Burkholderia andongensis</i> | BR-Dessein et al. 1097 | Zambia       | JF916921 | JF916915 | JF916905   | <i>Sericanthe andongensis</i> (Hiern) Robbr. |
| <i>Candidatus Burkholderia andongensis</i> | BR-Lemaire et al. 259  | South Africa | -        | JF916912 | JF916907   | <i>Sericanthe andongensis</i> (Hiern) Robbr. |
| <i>Candidatus Burkholderia andongensis</i> | BR-Lemaire et al. 271  | South Africa | JF916918 | JF916913 | JF916908   | <i>Sericanthe andongensis</i> (Hiern) Robbr. |
| <i>Candidatus Burkholderia andongensis</i> | BR-Lemaire et al. 286  | South Africa | JF916919 | -        | JF916906   | <i>Sericanthe andongensis</i> (Hiern) Robbr. |

|                                                  |                          |              |          |          |          |                                                |
|--------------------------------------------------|--------------------------|--------------|----------|----------|----------|------------------------------------------------|
| <i>Candidatus</i> Burkholderia andongensis       | BR-Lemaire et al. 293    | South Africa | JF916920 | JF916914 | JF916909 | <i>Sericanthe andongensis</i> (Hiern) Robbr.   |
| <i>Candidatus</i> Burkholderia anthocleistifolia | BR-Dessein et al. 1875   | Gabon        | JN053517 | JN054101 | JN053970 | <i>Psychotria anthocleistifolia</i> spec. nov. |
| <i>Candidatus</i> Burkholderia anthocleistifolia | BR-Dessein et al. 1917   | Gabon        | JN053518 | JN054102 | JN053971 | <i>Psychotria anthocleistifolia</i> spec. nov. |
| <i>Candidatus</i> Burkholderia bidentata         | BR-Lachenaud et al. 593  | Cameroon     | JN053519 | JN054103 | JN053972 | <i>Pavetta bidentata</i> Hiern                 |
| <i>Candidatus</i> Burkholderia bifaria           | BR-Dessein et al. 2862A  | Cameroon     | JN053520 | JN054104 | JN053973 | <i>Psychotria bifaria</i> Hiern                |
| <i>Candidatus</i> Burkholderia bifaria           | BR-Dessein et al. 2862D  | Cameroon     | JN053521 | JN054105 | JN053974 | <i>Psychotria bifaria</i> Hiern                |
| <i>Candidatus</i> Burkholderia bifaria           | BR-Lachenaud et al. 707  | Cameroon     | JN053522 | JN054106 | JN053975 | <i>Psychotria bifaria</i> Hiern                |
| <i>Candidatus</i> Burkholderia bifaria           | BR-Lachenaud et al. 707A | Cameroon     | JN053523 | JN054107 | JN053976 | <i>Psychotria bifaria</i> Hiern                |
| <i>Candidatus</i> Burkholderia brachyanthoides   | BR-2009044596            | Unknown      | JN053524 | JN054108 | JN053977 | <i>Psychotria brachyanthoides</i> De Wild.     |
| <i>Candidatus</i> Burkholderia brachyantha       | BR-Dessein et al. 2731   | Cameroon     | JN053525 | JN054109 | JN053978 | <i>Psychotria brachyantha</i> Hiern            |
| <i>Candidatus</i> Burkholderia brachyantha       | BR-Lachenaud et al. 876B | Cameroon     | JN053526 | JN054110 | JN053979 | <i>Psychotria brachyantha</i> Hiern            |
| <i>Candidatus</i> Burkholderia brevipaniculata   | BR-Dessein et al. 2916   | Cameroon     | JN053527 | JN054111 | JN053980 | <i>Psychotria brevipaniculata</i> De Wild.     |
| <i>Candidatus</i> Burkholderia calva             | BR-19620512              | Unknown      | HQ849116 | HQ849172 | JF295009 | <i>Psychotria calva</i> Hiern                  |
| <i>Candidatus</i> Burkholderia calva             | BR-19640306              | Ivory Coast  | HQ849117 | HQ849173 | HQ849227 | <i>Psychotria calva</i> Hiern                  |
| <i>Candidatus</i> Burkholderia calva             | BR-Lachenaud et al. 748A | Cameroon     | JN053528 | JN054112 | JN053981 | <i>Psychotria calva</i> Hiern                  |
| <i>Candidatus</i> Burkholderia calva             | BR-Lachenaud et al. 748B | Cameroon     | JN053529 | JN054113 | JN053982 | <i>Psychotria calva</i> Hiern                  |
| <i>Candidatus</i> Burkholderia camerunensis      | BR-Dessein et al. 1465   | Unknown      | JN053530 | JN054114 | JN053983 | <i>Psychotria camerunensis</i> E.M.A.Petit     |
| <i>Candidatus</i> Burkholderia camerunensis      | BR-Dessein et al. 1390   | Cameroon     | JN053531 | JN054115 | JN053984 | <i>Psychotria camerunensis</i> E.M.A.Petit     |
| <i>Candidatus</i> Burkholderia camerunensis      | BR-Dessein et al. 3165A  | Cameroon     | JN053532 | JN054198 | JN053986 | <i>Psychotria camerunensis</i> E.M.A.Petit     |
| <i>Candidatus</i> Burkholderia camerunensis      | BR-Dessein et al. 3165B  | Cameroon     | JN053533 | JN054199 | JN053987 | <i>Psychotria camerunensis</i> E.M.A.Petit     |
| <i>Candidatus</i> Burkholderia camerunensis      | BR-Lachenaud et al. 717A | Cameroon     | JN053534 | JN054200 | JN053988 | <i>Psychotria camerunensis</i> E.M.A.Petit     |
| <i>Candidatus</i> Burkholderia camerunensis      | BR-Lachenaud et al. 717B | Cameroon     | JN053535 | JN054201 | JN053989 | <i>Psychotria camerunensis</i> E.M.A.Petit     |
| <i>Candidatus</i> Burkholderia camerunensis      | BR-Lachenaud et al. 862  | Cameroon     | JN053536 | JN054116 | JN053985 | <i>Psychotria camerunensis</i> E.M.A.Petit     |
| <i>Candidatus</i> Burkholderia catophylla        | BR-Lemaire et al. 179    | South Africa | JN053537 | JN054117 | JN053990 | <i>Pavetta catophylla</i> K.Schum.             |
| <i>Candidatus</i> Burkholderia catophylla        | BR-Lemaire et al. 180    | South Africa | JN053538 | JN054118 | JN053991 | <i>Pavetta catophylla</i> K.Schum.             |
| <i>Candidatus</i> Burkholderia catophylla        | BR-Lemaire et al. 182    | South Africa | JN053539 | JN054119 | -        | <i>Pavetta catophylla</i> K.Schum.             |
| <i>Candidatus</i> Burkholderia catophylla        | BR-Lemaire et al. 219    | South Africa | JN053540 | JN054120 | JN053992 | <i>Pavetta catophylla</i> K.Schum.             |
| <i>Candidatus</i> Burkholderia rhizomatosa       | BR-Dessein et al. 2239   | Gabon        | JN053595 | JN054178 | JN054049 | <i>Psychotria cf rhizomatosa</i> De Wild.      |
| <i>Candidatus</i> Burkholderia cooperi           | BR-Lemaire et al. 75     | South Africa | JN053541 | JN054121 | JN053993 | <i>Pavetta cooperi</i> Harv. & Sond.           |
| <i>Candidatus</i> Burkholderia cooperi           | BR-Lemaire et al. 247    | South Africa | JN053542 | JN054122 | JN053994 | <i>Pavetta cooperi</i> Harv. & Sond.           |
| <i>Candidatus</i> Burkholderia crenata           | BR-19073685              | Unknown      | JF416281 | -        | JF416287 | <i>Ardisia crenata</i> Roxb.                   |
| <i>Candidatus</i> Burkholderia crenata           | BR-19073686              | Unknown      | JF416282 | -        | JF416288 | <i>Ardisia crenata</i> Roxb.                   |
| <i>Candidatus</i> Burkholderia crenata           | RBGE-19696187            | Unknown      | JF416283 | -        | JF416289 | <i>Ardisia crenata</i> Roxb.                   |
| <i>Candidatus</i> Burkholderia darwiniana        | BR-Dessein et al. 2682   | Cameroon     | JN053543 | JN054123 | JN053995 | <i>Psychotria darwiniana</i> Cheek             |

|                                              |                         |              |          |          |          |                                                  |
|----------------------------------------------|-------------------------|--------------|----------|----------|----------|--------------------------------------------------|
| <i>Candidatus Burkholderia darwiniana</i>    | BR-Dessein et al. 2720A | Cameroon     | JN053544 | JN054124 | JN053996 | <i>Psychotria darwiniana</i> Cheek               |
| <i>Candidatus Burkholderia edentula</i>      | BR-Lemaire et al. 60    | South Africa | JN053545 | JN054125 | JN053997 | <i>Pavetta edentula</i> Sond.                    |
| <i>Candidatus Burkholderia edentula</i>      | BR-Lemaire et al. 70C   | South Africa | JN053546 | JN054126 | JN053998 | <i>Pavetta edentula</i> Sond.                    |
| <i>Candidatus Burkholderia edentula</i>      | BR-Lemaire et al. 135   | South Africa | JN053547 | JN054127 | JN053999 | <i>Pavetta edentula</i> Sond.                    |
| <i>Candidatus Burkholderia expanssissima</i> | BR-Groeninckx et al. 4  | Madagascar   | JN053548 | JN054128 | JN054000 | <i>Psychotria expanssissima</i> K.Schum.         |
| <i>Candidatus Burkholderia eylesii</i>       | BR-Lemaire et al. 87    | South Africa | JN053549 | JN054129 | JN054001 | <i>Pavetta eylesii</i> S.Moore                   |
| <i>Candidatus Burkholderia eylesii</i>       | BR-Lemaire et al. 253C  | South Africa | JN053550 | -        | JN054002 | <i>Pavetta eylesii</i> S.Moore                   |
| <i>Candidatus Burkholderia fleuryana</i>     | BR-Dessein et al. 2578  | Cameroon     | JN053551 | JN054130 | JN054003 | <i>Psychotria fleuryana</i> E.M.A.Petit          |
| <i>Candidatus Burkholderia fleuryana</i>     | BR-Dessein et al. 2675  | Cameroon     | JN053552 | JN054131 | JN054004 | <i>Psychotria fleuryana</i> E.M.A.Petit          |
| <i>Candidatus Burkholderia gardeniifolia</i> | BR-Lemaire et al. 276   | South Africa | JN053553 | JN054132 | JN054005 | <i>Pavetta gardeniifolia</i> Hochst. ex A.Rich.  |
| <i>Candidatus Burkholderia gardeniifolia</i> | BR-Lemaire et al. 252   | South Africa | JN053554 | -        | JN054006 | <i>Pavetta gardeniifolia</i> Hochst. ex A.Rich.  |
| <i>Candidatus Burkholderia gardeniifolia</i> | BR-Lemaire et al. 136   | South Africa | JN053555 | JN054133 | JN054007 | <i>Pavetta gardeniifolia</i> Hochst. ex A.Rich.  |
| <i>Candidatus Burkholderia hispidae</i>      | BR-Dessein et al. 3176  | Cameroon     | HQ849122 | HQ849178 | HQ849231 | <i>Pavetta hispida</i> Hiern                     |
| <i>Candidatus Burkholderia hispidae</i>      | BR-Lachenaud et al. 732 | Cameroon     | HQ849123 | HQ849179 | HQ849232 | <i>Pavetta hispida</i> Hiern                     |
| <i>Candidatus Burkholderia holtzii</i>       | UPS-Luke 8342           | Kenya        | -        | JN054134 | JN054008 | <i>Psychotria holtzii</i> (K.Schum.) E.M.A.Petit |
| <i>Candidatus Burkholderia humilis</i>       | BR-Dessein et al. 1497  | Cameroon     | JN053556 | JN054136 | JN054010 | <i>Psychotria humilis</i> Hiern                  |
| <i>Candidatus Burkholderia humilis</i>       | BR-Dessein et al. 1581  | Cameroon     | -        | JN054135 | JN054009 | <i>Psychotria humilis</i> Hiern                  |
| <i>Candidatus Burkholderia humilis</i>       | BR-Dessein et al. 3175  | Cameroon     | JN053557 | JN054137 | JN054011 | <i>Psychotria humilis</i> Hiern                  |
| <i>Candidatus Burkholderia humilis</i>       | BR-Lachenaud et al. 820 | Cameroon     | -        | JN054138 | JN054012 | <i>Psychotria humilis</i> Hiern                  |
| <i>Candidatus Burkholderia inandensis</i>    | BR-Lemaire et al. 244   | South Africa | JN053558 | JN054139 | JN054013 | <i>Pavetta inandensis</i> Bremek.                |
| <i>Candidatus Burkholderia kikwitensis</i>   | BR-2004145187           | Zambia       | JN053559 | JN054140 | JN054014 | <i>Psychotria kikwitensis</i> De Wild.           |
| <i>Candidatus Burkholderia kikwitensis</i>   | BR-Dessein et al. 1043  | Zambia       | JN053560 | JN054141 | JN054015 | <i>Psychotria kikwitensis</i> De Wild.           |
| <i>Candidatus Burkholderia kimuenzae</i>     | BR-Stoffelen et al. 7   | D.R.Congo    | JN053561 | JN054142 | JN054016 | <i>Psychotria kimuenzae</i> De Wild.             |
| <i>Candidatus Burkholderia kirkii</i>        | BR-19536779             | Unknown      | HQ849109 | HQ849165 | HQ849220 | <i>Psychotria kirkii</i> Hiern                   |
| <i>Candidatus Burkholderia kirkii</i>        | BR-2000194661           | D.R.Congo    | HQ849110 | HQ849166 | HQ849221 | <i>Psychotria kirkii</i> Hiern                   |
| <i>Candidatus Burkholderia kirkii</i>        | BR-19750521             | D.R.Congo    | JN053562 | JN054143 | JN054017 | <i>Psychotria kirkii</i> Hiern                   |
| <i>Candidatus Burkholderia kirkii</i>        | BR-2002152647           | Unknown      | HQ849111 | HQ849167 | HQ849222 | <i>Psychotria kirkii</i> Hiern                   |
| <i>Candidatus Burkholderia kirkii</i>        | BR-2002120315           | Unknown      | HQ849112 | HQ849168 | HQ849223 | <i>Psychotria kirkii</i> Hiern                   |
| <i>Candidatus Burkholderia kirkii</i>        | BR-2001051392           | Unknown      | HQ849113 | HQ849169 | HQ849224 | <i>Psychotria kirkii</i> Hiern                   |
| <i>Candidatus Burkholderia kirkii</i>        | BR-1998182519           | Kenya        | HQ849114 | HQ849170 | HQ849225 | <i>Psychotria kirkii</i> Hiern                   |
| <i>Candidatus Burkholderia kirkii</i>        | BR-200103624            | Unknown      | HQ849115 | HQ849171 | HQ849226 | <i>Psychotria kirkii</i> Hiern                   |
| <i>Candidatus Burkholderia konguensis</i>    | BR-Dessein et al. 2306  | Gabon        | JN053563 | JN054151 | JN054025 | <i>Psychotria konguensis</i> Hiern               |
| <i>Candidatus Burkholderia konguensis</i>    | BR-Dessein et al. 1434  | Cameroon     | JN053564 | JN054149 | JN054023 | <i>Psychotria konguensis</i> Hiern               |
| <i>Candidatus Burkholderia konguensis</i>    | BR-Dessein et al. 1705  | Gabon        | JN053565 | JN054150 | JN054024 | <i>Psychotria konguensis</i> Hiern               |

|                                              |                          |              |          |          |          |                                            |
|----------------------------------------------|--------------------------|--------------|----------|----------|----------|--------------------------------------------|
| <i>Candidatus Burkholderia konguensis</i>    | BR-Lachenaud et al. 636E | Cameroon     | JN053566 | JN054152 | JN054026 | <i>Psychotria konguensis</i> Hiern         |
| <i>Candidatus Burkholderia konguensis</i>    | BR-Lachenaud et al. 932  | Cameroon     | JN053567 | JN054153 | JN054027 | <i>Psychotria konguensis</i> Hiern         |
| <i>Candidatus Burkholderia kotzei</i>        | BR-Lemaire et al. 126    | South Africa | JN053568 | JN054154 | JN054028 | <i>Pavetta kotzei</i> Bremek.              |
| <i>Candidatus Burkholderia lanceolata</i>    | BR-Lemaire et al. 40     | South Africa | JN053569 | JN054155 | JN054029 | <i>Pavetta lanceolata</i> Eckl.            |
| <i>Candidatus Burkholderia lanceolata</i>    | BR-Lemaire et al. 41     | South Africa | JN053570 | JN054156 | JN054030 | <i>Pavetta lanceolata</i> Eckl.            |
| <i>Candidatus Burkholderia leptophylla</i>   | BR-Dessein et al. 3111A  | Cameroon     | JN053571 | JN054157 | JN054031 | <i>Psychotria leptophylla</i> Hiern        |
| <i>Candidatus Burkholderia leptophylla</i>   | BR-Dessein et al. 3111B  | Cameroon     | JN053572 | JN054158 | JN054032 | <i>Psychotria leptophylla</i> Hiern        |
| <i>Candidatus Burkholderia leptophylla</i>   | BR-Dessein et al. 3159   | Cameroon     | JN053573 | JN054159 | JN054033 | <i>Psychotria leptophylla</i> Hiern        |
| <i>Candidatus Burkholderia leptophylla</i>   | BR-Dessein et al. 2570B  | Cameroon     | JN053574 | JN054160 | JN054034 | <i>Psychotria leptophylla</i> Hiern        |
| <i>Candidatus Burkholderia leptophylla</i>   | BR-Dessein et al. 2709A  | Cameroon     | JN053575 | JN054161 | -        | <i>Psychotria leptophylla</i> Hiern        |
| <i>Candidatus Burkholderia leptophylla</i>   | BR-Dessein et al. 2824A  | Cameroon     | JN053576 | JN054162 | JN054035 | <i>Psychotria leptophylla</i> Hiern        |
| <i>Candidatus Burkholderia leptophylla</i>   | BR-Lachenaud et al. 591  | Cameroon     | JN053577 | JN054163 | JN054036 | <i>Psychotria leptophylla</i> Hiern        |
| <i>Candidatus Burkholderia leptophylla</i>   | BR-Lachenaud et al. 864  | Cameroon     | JN053578 | JN054164 | JN054037 | <i>Psychotria leptophylla</i> Hiern        |
| <i>Candidatus Burkholderia letouzeyi</i>     | BR-Dessein et al. 1731   | Gabon        | JN053579 | JN054165 | JN054038 | <i>Psychotria letouzeyi</i> E.M.A.Petit    |
| <i>Candidatus Burkholderia letouzeyi</i>     | BR-Dessein et al. 2140   | Gabon        | JN053580 | JN054166 | JN054039 | <i>Psychotria letouzeyi</i> E.M.A.Petit    |
| <i>Candidatus Burkholderia letouzeyi</i>     | BR-Lachenaud et al. 931  | Cameroon     | JN053581 | JN054167 | JN054040 | <i>Psychotria letouzeyi</i> E.M.A.Petit    |
| <i>Candidatus Burkholderia lokohensis</i>    | BR-Tosh et al. 238       | Madagascar   | JN053582 | JN054168 | JN054041 | <i>Psychotria lokohensis</i> Bremek.       |
| <i>Candidatus Burkholderia mamillata</i>     | BR-10005023              | Unknown      | JF416284 | JN054169 | JF416290 | <i>Ardisia mamillata</i> Hance             |
| <i>Candidatus Burkholderia mamillata</i>     | BR-10005024              | Unknown      | JF416285 | JN054170 | JF416291 | <i>Ardisia mamillata</i> Hance             |
| <i>Candidatus Burkholderia mannii</i>        | BR-Dessein et al. 2493   | Gabon        | JN053583 | JN054171 | JN054042 | <i>Psychotria mannii</i> Hiern             |
| <i>Candidatus Burkholderia mannii</i>        | BR-Dessein et al. 1793   | Gabon        | JN053584 | JN054172 | JN054043 | <i>Psychotria mannii</i> Hiern             |
| <i>Candidatus Burkholderia mannii</i>        | BR-Dessein et al. 1807   | Gabon        | JN053585 | JN054173 | JN054044 | <i>Psychotria mannii</i> Hiern             |
| <i>Candidatus Burkholderia mannii</i>        | BR-Dessein et al. 2053   | Gabon        | JN053586 | JN054175 | JN054045 | <i>Psychotria mannii</i> Hiern             |
| <i>Candidatus Burkholderia mannii</i>        | BR-Dessein et al. 2053   | Gabon        | -        | JN054174 | JN054046 | <i>Psychotria mannii</i> Hiern             |
| <i>Candidatus Burkholderia mannii</i>        | BR-Dessein et al. 2299   | Gabon        | JN053587 | JN054176 | JN054047 | <i>Psychotria mannii</i> Hiern             |
| <i>Candidatus Burkholderia mannii</i>        | BR-Dessein et al. 2375   | Gabon        | JN053588 | JN054177 | JN054048 | <i>Psychotria mannii</i> Hiern             |
| <i>Candidatus Burkholderia nigropunctata</i> | BR-Dessein et al. 1849   | D.R.Congo    | HQ849118 | HQ849174 | HQ849228 | <i>Psychotria nigropunctata</i> Hiern      |
| <i>Candidatus Burkholderia nigropunctata</i> | BR-Stoffelen et al. 13   | Gabon        | HQ849119 | HQ849175 | JF295008 | <i>Psychotria nigropunctata</i> Hiern      |
| <i>Candidatus Burkholderia pendulothyrsa</i> | BR-Dessein et al. 2438   | Gabon        | JN053589 | JN054179 | JN054050 | <i>Psychotria pendulothyrsa</i> spec. nov. |
| <i>Candidatus Burkholderia pendulothyrsa</i> | BR-Lachenaud et al. 647B | Cameroon     | JN053590 | JN054180 | JN054051 | <i>Psychotria pendulothyrsa</i> spec. nov. |
| <i>Candidatus Burkholderia petiti</i>        | BR-Dessein et al. 1592   | Cameroon     | JF916923 | JF916916 | JF916911 | <i>Sericanthe petiti</i> (N.Hallé) Robbr.  |
| <i>Candidatus Burkholderia petiti</i>        | BR-Lachenaud et al. 658  | Cameroon     | JF916922 | JF916917 | JF916910 | <i>Sericanthe petiti</i> (N.Hallé) Robbr.  |
| <i>Candidatus Burkholderia pumila</i>        | BR-2004143571            | Zambia       | JN053591 | JN054181 | JN054052 | <i>Psychotria pumila</i> Hiern             |
| <i>Candidatus Burkholderia kirkii</i>        | BR-De Block et al. 372   | Kenya        | JN053592 | JN054182 | JN054053 | <i>Psychotria kirkii</i> Hiern             |

|                                               |                         |              |          |          |          |                                                 |
|-----------------------------------------------|-------------------------|--------------|----------|----------|----------|-------------------------------------------------|
| <i>Candidatus Burkholderia recurva</i>        | BR-Dessein et al. 2550A | Cameroon     | JN053593 | JN054183 | JN054054 | <i>Psychotria recurva</i> Hiern                 |
| <i>Candidatus Burkholderia recurva</i>        | BR-Dessein et al. 2575  | Cameroon     | JN053594 | JN054184 | JN054055 | <i>Psychotria recurva</i> Hiern                 |
| <i>Candidatus Burkholderia rhizomatosa</i>    | BR-Dessein et al. 1772  | Gabon        | JN053596 | JN054185 | JN054056 | <i>Psychotria rhizomatosa</i> De Wild.          |
| <i>Candidatus Burkholderia rhizomatosa</i>    | BR-Dessein et al. 1785  | Gabon        | JN053598 | JN054187 | JN054057 | <i>Psychotria rhizomatosa</i> De Wild.          |
| <i>Candidatus Burkholderia rhizomatosa</i>    | BR-Dessein et al. 2092  | Gabon        | JN053599 | JN054188 | JN054058 | <i>Psychotria rhizomatosa</i> De Wild.          |
| <i>Candidatus Burkholderia rhizomatosa</i>    | BR-Dessein et al. 2223  | Gabon        | JN053600 | JN054189 | JN054059 | <i>Psychotria rhizomatosa</i> De Wild.          |
| <i>Candidatus Burkholderia rhizomatosa</i>    | BR-Dessein et al. 2240  | Gabon        | JN053601 | JN054190 | JN054060 | <i>Psychotria rhizomatosa</i> De Wild.          |
| <i>Candidatus Burkholderia rhizomatosa</i>    | BR-Dessein et al. 2368  | Gabon        | JN053597 | JN054186 | JN054061 | <i>Psychotria rhizomatosa</i> De Wild.          |
| <i>Candidatus Burkholderia rhizomatosa</i>    | BR-Dessein et al. 2432  | Gabon        | JN053602 | JN054191 | JN054062 | <i>Psychotria rhizomatosa</i> De Wild.          |
| <i>Candidatus Burkholderia rhizomatosa</i>    | BR-Dessein et al. 2551B | Cameroon     | JN053603 | JN054192 | JN054063 | <i>Psychotria rhizomatosa</i> De Wild.          |
| <i>Candidatus Burkholderia rhizomatosa</i>    | BR-Dessein et al. 2674  | Cameroon     | JN053604 | JN054193 | JN054064 | <i>Psychotria rhizomatosa</i> De Wild.          |
| <i>Candidatus Burkholderia rigidae</i>        | BR-Lachenaud et al. 694 | Cameroon     | HQ849120 | HQ849176 | HQ849229 | <i>Pavetta rigida</i> Hiern                     |
| <i>Candidatus Burkholderia rigidae</i>        | BR-Lachenaud et al. 877 | Cameroon     | HQ849121 | HQ849177 | HQ849230 | <i>Pavetta rigida</i> Hiern                     |
| <i>Candidatus Burkholderia rubripilis</i>     | BR-Dessein et al. 1806  | Gabon        | JN053605 | -        | JN054065 | <i>Psychotria rubripilis</i> K.Schum.           |
| <i>Candidatus Burkholderia rubripilis</i>     | BR-Dessein et al. 2295  | Gabon        | JN053606 | JN054194 | JN054066 | <i>Psychotria rubripilis</i> K.Schum.           |
| <i>Candidatus Burkholderia rubripilis</i>     | BR-Dessein et al. 1973  | Gabon        | JN053607 | JN054195 | JN054067 | <i>Psychotria rubripilis</i> K.Schum.           |
| <i>Candidatus Burkholderia rubripilis</i>     | BR-Dessein et al. 2077  | Gabon        | JN053608 | JN054196 | JN054068 | <i>Psychotria rubripilis</i> K.Schum.           |
| <i>Candidatus Burkholderia rubripilis</i>     | BR-Dessein et al. 3174  | Cameroon     | JN053609 | JN054197 | JN054069 | <i>Psychotria rubripilis</i> K.Schum.           |
| <i>Candidatus Burkholderia rubristipulata</i> | BR-Dessein et al. 2107  | Gabon        | JN053610 | -        | JN054070 | <i>Psychotria rubristipulata</i> R.D.Good       |
| <i>Candidatus Burkholderia schumanniana</i>   | BR-Dessein et al. 1137  | Zambia       | HQ849125 | HQ849181 | HQ849234 | <i>Pavetta schumanniana</i> F.Hoffm.ex K.Schum. |
| <i>Candidatus Burkholderia schumanniana</i>   | BR-2001944257           | D.R.Congo    | HQ849126 | HQ849182 | HQ849235 | <i>Pavetta schumanniana</i> F.Hoffm.ex K.Schum. |
| <i>Candidatus Burkholderia schumanniana</i>   | BR-2004143066           | Zambia       | HQ849127 | HQ849183 | HQ849236 | <i>Pavetta schumanniana</i> F.Hoffm.ex K.Schum. |
| <i>Candidatus Burkholderia schumanniana</i>   | BR-Dessein et al. 1099  | Zambia       | HQ849124 | HQ849180 | HQ849233 | <i>Pavetta schumanniana</i> F.Hoffm.ex K.Schum. |
| <i>Candidatus Burkholderia schumanniana</i>   | BR-Lemaire et al. 1     | South Africa | HQ849128 | HQ849184 | HQ849237 | <i>Pavetta schumanniana</i> F.Hoffm.ex K.Schum. |
| <i>Candidatus Burkholderia schumanniana</i>   | BR-Lemaire et al. 99    | South Africa | HQ849129 | HQ849185 | HQ849238 | <i>Pavetta schumanniana</i> F.Hoffm.ex K.Schum. |
| <i>Candidatus Burkholderia sp</i>             | BR-20041440             | Unknown      | JN053611 | JN054202 | JN054071 | <i>Pavetta sp.</i> L.                           |
| <i>Candidatus Burkholderia sp</i>             | BR-2004114076           | Unknown      | JN053612 | JN054204 | JN054073 | <i>Pavetta sp.</i> L.                           |
| <i>Candidatus Burkholderia sp</i>             | BR-2006012338           | Unknown      | JN053613 | JN054203 | JN054072 | <i>Pavetta sp.</i> L.                           |
| <i>Candidatus Burkholderia sp</i>             | BR-Dessein et al. 1974  | Gabon        | JN053614 | JN054205 | JN054074 | <i>Psychotria sp.</i> L.                        |
| <i>Candidatus Burkholderia sp</i>             | BR-Dessein et al. 3171  | Cameroon     | JN053615 | -        | JN054075 | <i>Pavetta sp.</i> L.                           |
| <i>Candidatus Burkholderia sp</i>             | BR-Dessein et al. 2719  | Cameroon     | JN053616 | JN054206 | JN054076 | <i>Pavetta sp.</i> L.                           |
| <i>Candidatus Burkholderia sp</i>             | BR-Lachenaud et al. 616 | Cameroon     | JN053617 | JN054207 | JN054077 | <i>Pavetta sp.</i> L.                           |
| <i>Candidatus Burkholderia sp</i>             | BR-Lachenaud et al. 919 | Cameroon     | JN053618 | JN054208 | JN054078 | <i>Pavetta sp.</i> L.                           |
| <i>Candidatus Burkholderia sp.</i>            | BR-Lachenaud et al. 882 | Cameroon     | JN053619 | -        | -        | <i>Pavetta sp.</i> L.                           |

|                                               |                          |              |          |          |          |                                           |
|-----------------------------------------------|--------------------------|--------------|----------|----------|----------|-------------------------------------------|
| <i>Candidatus Burkholderia spithamea</i>      | BR-2000194762            | D.R.Congo    | JN053620 | -        | JN054079 | <i>Psychotria spithamea</i> S.Moore       |
| <i>Candidatus Burkholderia subpunctata</i>    | BR-Dessein et al. 2475   | Gabon        | -        | JN054209 | JN054080 | <i>Psychotria subpunctata</i> Hiern       |
| <i>Candidatus Burkholderia subpunctata</i>    | BR-Lachenaud et al. 775A | Cameroon     | JN053621 | JN054210 | JN054081 | <i>Psychotria subpunctata</i> Hiern       |
| <i>Candidatus Burkholderia subpunctata</i>    | BR-Lachenaud et al. 815  | Cameroon     | JN053622 | JN054211 | JN054082 | <i>Psychotria subpunctata</i> Hiern       |
| <i>Candidatus Burkholderia trichardtensis</i> | BR-Lemaire et al. 280    | South Africa | JN053623 | JN054212 | JN054083 | <i>Pavetta trichardtensis</i> Bremek.     |
| <i>Candidatus Burkholderia trichardtensis</i> | BR-Lemaire et al. 282    | South Africa | JN053624 | JN054213 | JN054084 | <i>Pavetta trichardtensis</i> Bremek.     |
| <i>Candidatus Burkholderia trichardtensis</i> | BR-Lemaire et al. 295    | South Africa | JN053625 | JN054214 | JN054085 | <i>Pavetta trichardtensis</i> Bremek.     |
| <i>Candidatus Burkholderia trichardtensis</i> | BR-Lemaire et al. 299    | South Africa | JN053626 | -        | JN054086 | <i>Pavetta trichardtensis</i> Bremek.     |
| <i>Candidatus Burkholderia uapacifolia</i>    | BR-Dessein et al. 1732   | Gabon        | JN053627 | JN054215 | JN054087 | <i>Psychotria uapacifolia</i> spec. nov.  |
| <i>Candidatus Burkholderia uapacifolia</i>    | BR-Dessein et al. 2084   | Gabon        | JN053628 | JN054216 | JN054088 | <i>Psychotria uapacifolia</i> spec. nov.  |
| <i>Candidatus Burkholderia umbellifera</i>    | BR-Dessein et al. 2414   | Gabon        | JN053629 | JN054217 | JN054089 | <i>Psychotria umbellifera</i> E.M.A.Petit |
| <i>Candidatus Burkholderia vanwykii</i>       | BR-Lemaire et al. 154    | South Africa | JN053630 | -        | JN054090 | <i>Pavetta vanwykiana</i> Bridson         |
| <i>Candidatus Burkholderia vanwykii</i>       | BR-Lemaire et al. 168    | South Africa | JN053631 | -        | JN054091 | <i>Pavetta vanwykiana</i> Bridson         |
| <i>Candidatus Burkholderia vanwykii</i>       | BR-Lemaire et al. 181    | South Africa | JN053632 | -        | JN054092 | <i>Pavetta vanwykiana</i> Bridson         |
| <i>Candidatus Burkholderia verschuerenii</i>  | BR-without voucher       | Unknown      | JN053633 | JN054218 | JN054093 | <i>Psychotria verschuerenii</i> De Wild.  |
| <i>Candidatus Burkholderia verschuerenii</i>  | BR-Dessein et al. 1760   | Gabon        | JN053634 | JN054219 | JN054094 | <i>Psychotria verschuerenii</i> De Wild.  |
| <i>Candidatus Burkholderia verschuerenii</i>  | BR-750204                | Cameroon     | JN053635 | JN054220 | JN054095 | <i>Psychotria verschuerenii</i> De Wild.  |
| <i>Candidatus Burkholderia verschuerenii</i>  | BR-Lachenaud et al. 655A | Cameroon     | JN053636 | JN054221 | JN054096 | <i>Psychotria verschuerenii</i> De Wild.  |
| <i>Candidatus Burkholderia verschuerenii</i>  | BR-Lachenaud et al. 655B | Cameroon     | JN053637 | JN054222 | JN054097 | <i>Psychotria verschuerenii</i> De Wild.  |
| <i>Candidatus Burkholderia virens</i>         | RBGE-20042025            | China        | JF416286 | -        | JF416292 | <i>Ardisia virens</i> Kurz                |
