# Supplementary material for: Bacterial Leaf Symbiosis in Angiosperms: Host Specificity without Co-Speciation
Source: PubMed Central journal article supplement (PMC3168474; doi:10.1371/journal.pone.0024430), 2011-09-07

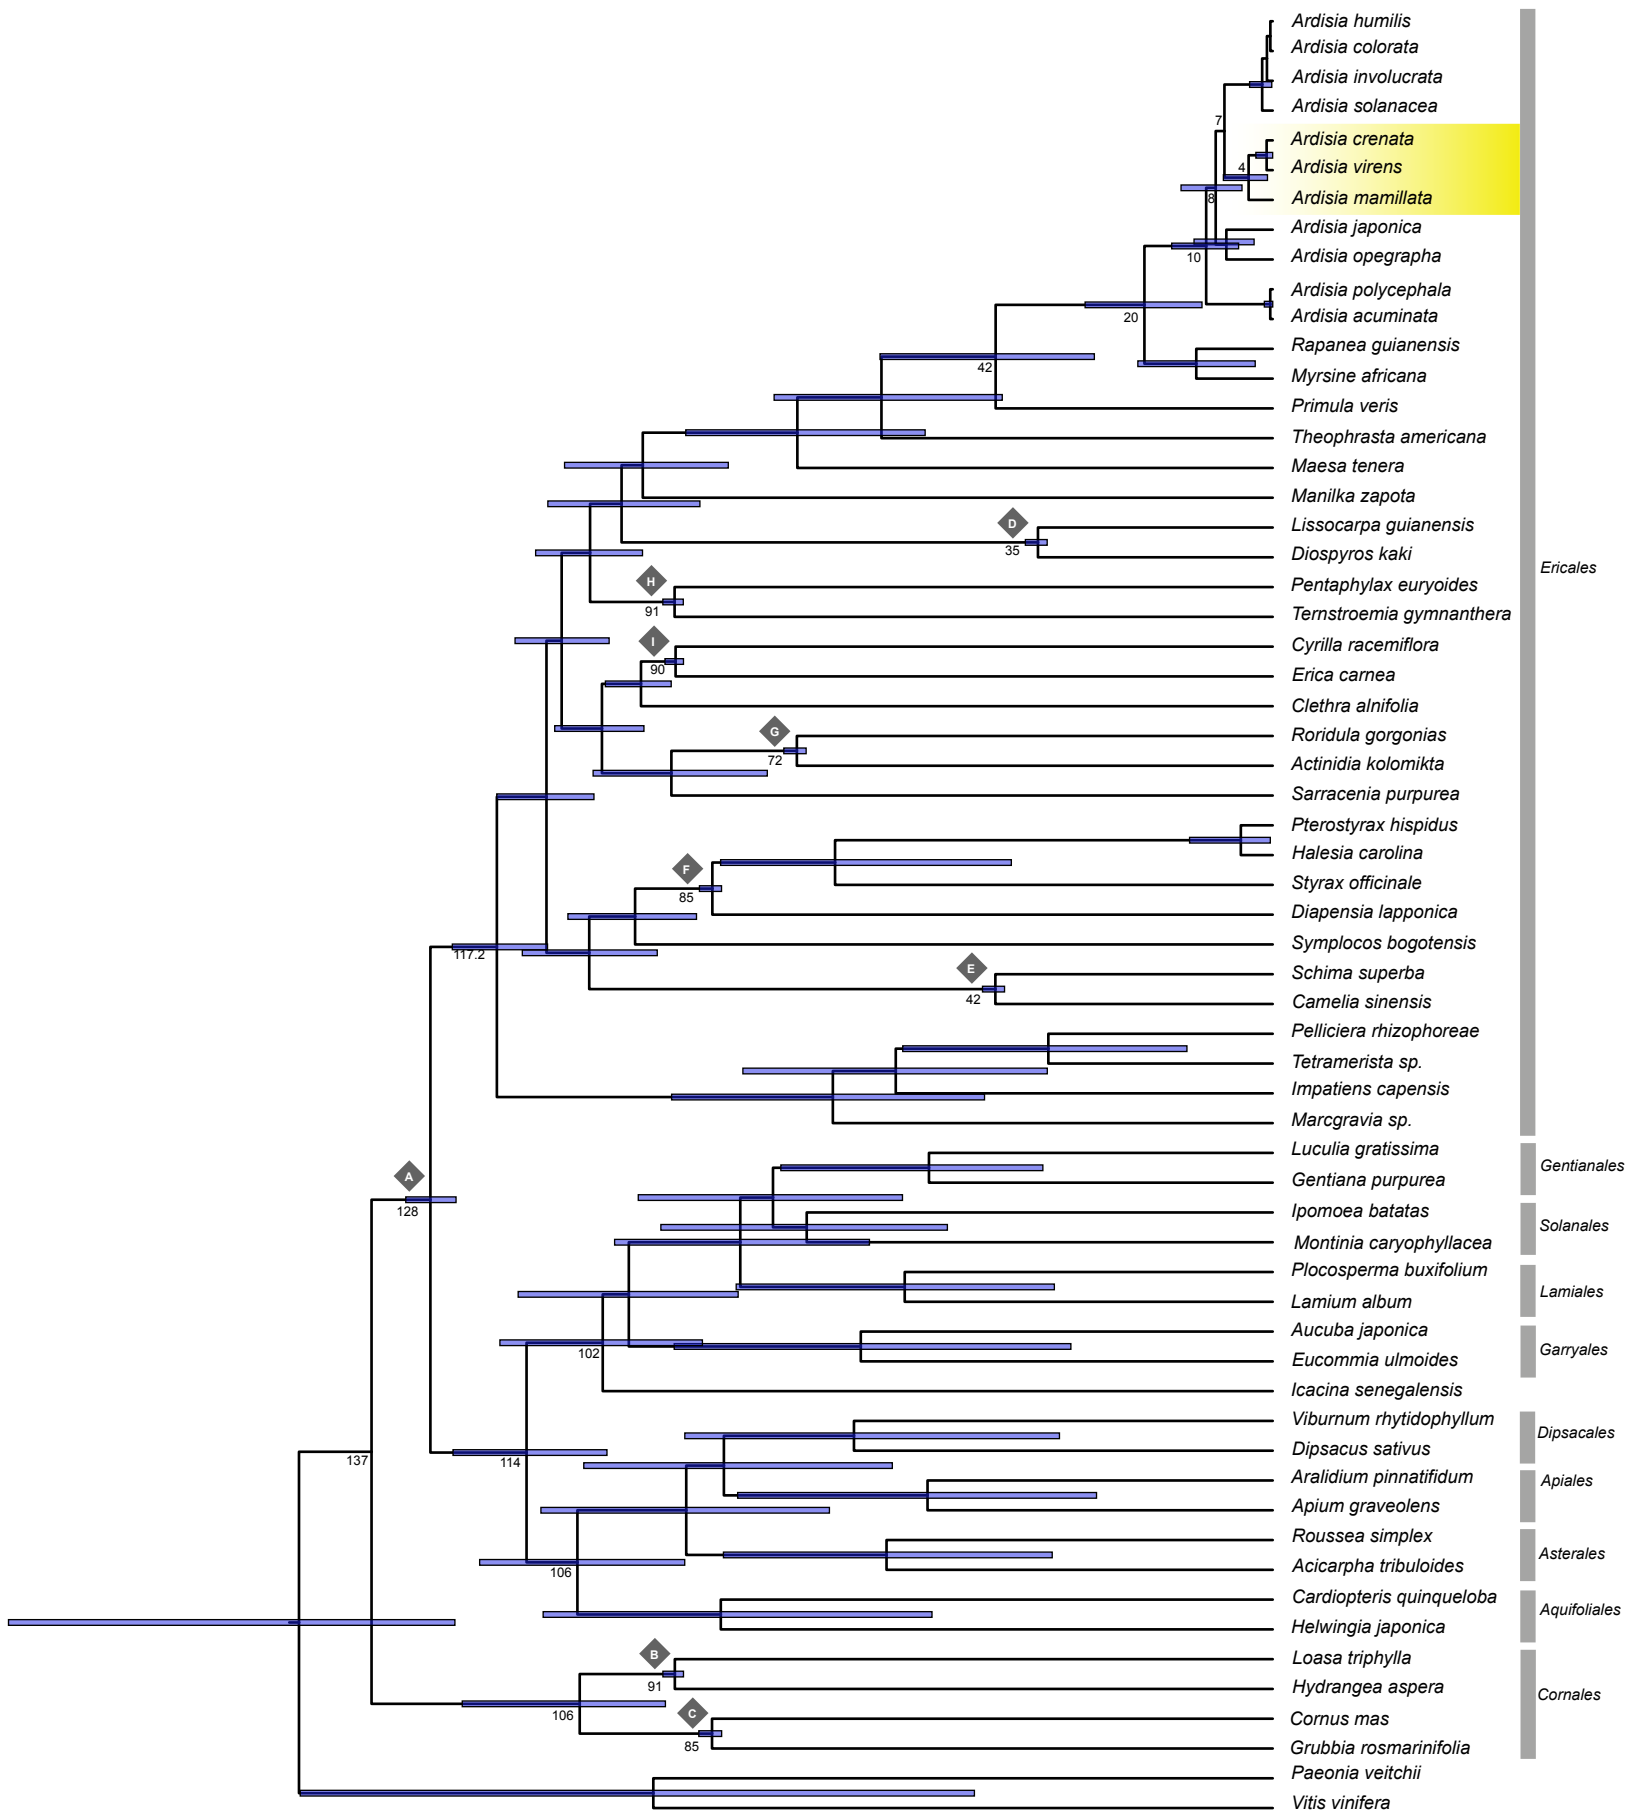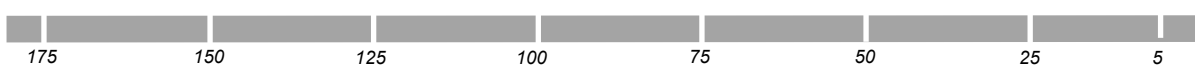

Supplement: pone.0024430.s008.pdf [file pone.0024430.s008.pdf]
